# Supplementary material for: Microbially mediated synthesis of vivianite by Desulfosporosinus on the way to phosphorus recovery
Source: Royal Society of Chemistry journal article supplement (doi:10.1039/d4va00040d), 2024-01-01
Supplement: d4va00040d1.pdf [file d4va00040d1.pdf]

Supplementary material

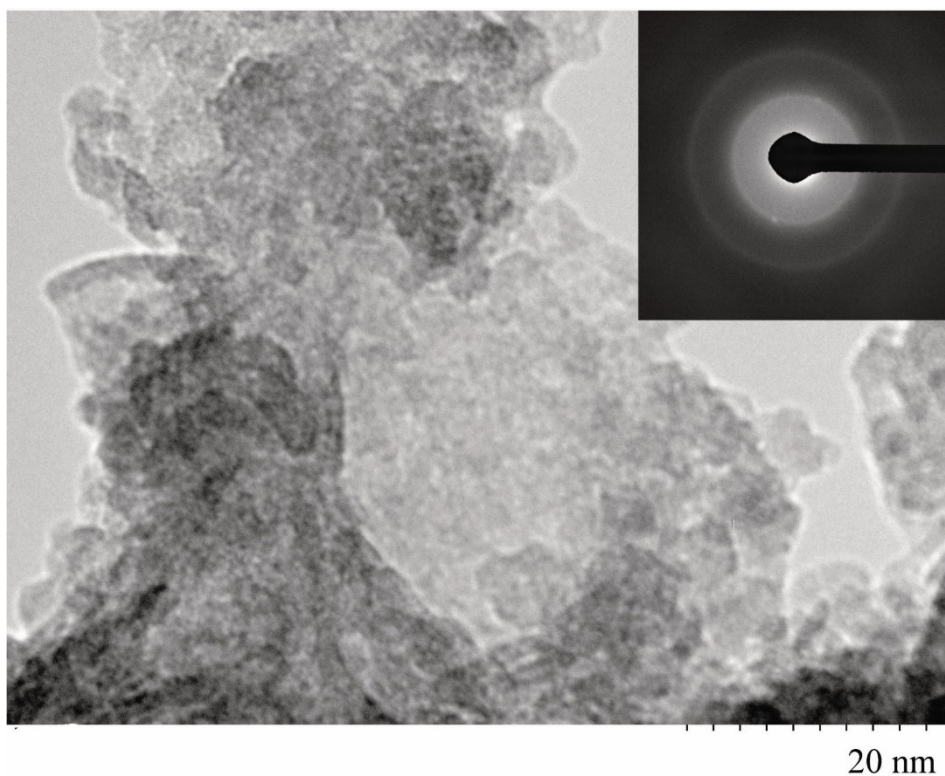

Fig. S1. TEM image and microdiffraction patterns of the reference sample.

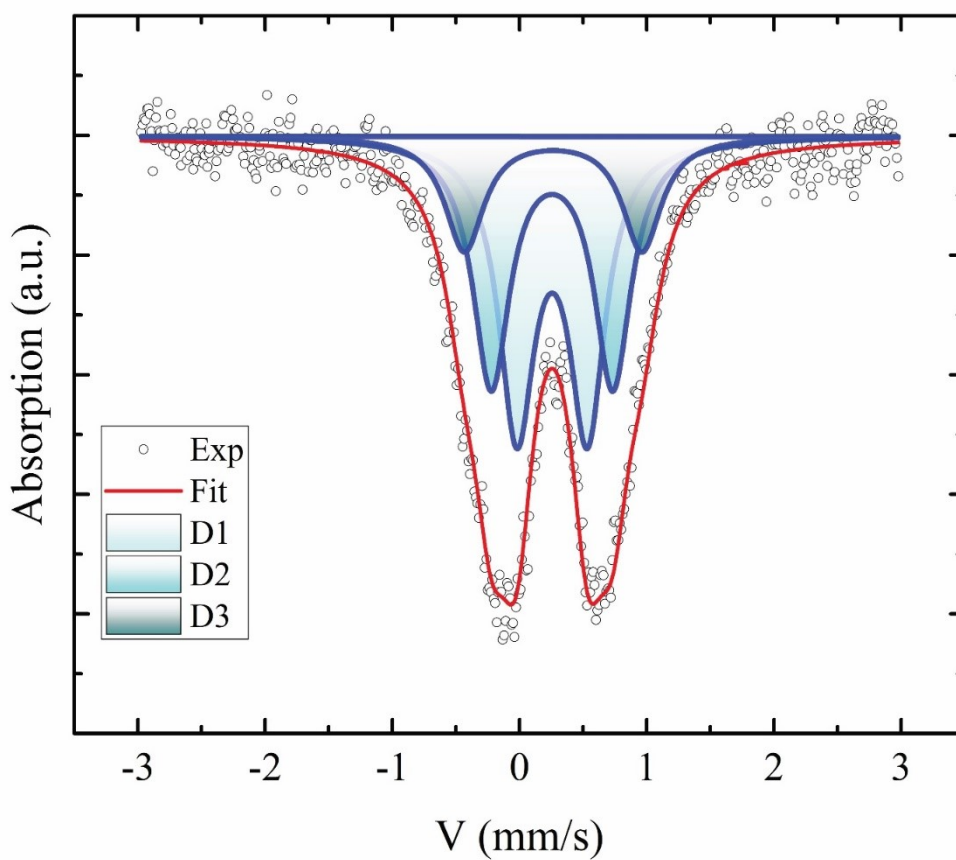

Fig. S2. Mössbauer spectrum of the reference sample at a temperature of 300 K. Shaded areas show the partial components obtained during processing.

Table S1. Mössbauer parameters of the sample in the temperature range of 4–300 K. IS is the chemical shift relative to  $\alpha$ -Fe,  $H_{\text{hf}}$  is the hyperfine field on iron nuclei, QS is the quadrupole splitting,  $W$  is the Mössbauer line full width at half maximum, and  $A$  is the relative site occupancy.

|       | IS, mm/s<br>$\pm 0.005$ | $H$ ,<br>kOe, $\pm 3$ | QS, mm/s<br>$\pm 0.01$ | $W$ , mm/s<br>$\pm 0.01$ | $A$ , %<br>$\pm 0.03$ | Origin                                            |
|-------|-------------------------|-----------------------|------------------------|--------------------------|-----------------------|---------------------------------------------------|
| 300 K |                         |                       |                        |                          |                       |                                                   |
| D1    | 0.363                   | --                    | 0.56                   | 0.34                     | 0.45                  | $\text{Fe}_2\text{O}_3 \cdot n\text{H}_2\text{O}$ |
| D2    | 0.365                   | --                    | 0.97                   | 0.35                     | 0.36                  |                                                   |
| D3    | 0.371                   | --                    | 1.37                   | 0.37                     | 0.19                  |                                                   |

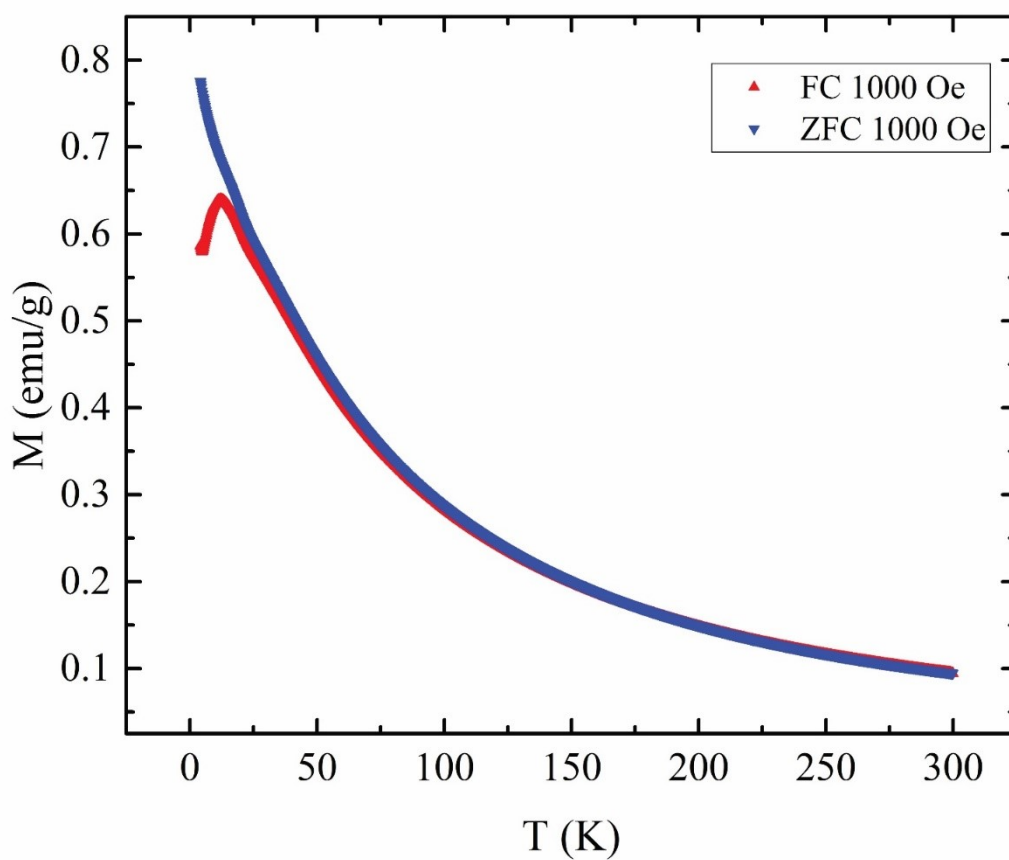

Fig. S3. FC and ZFC temperature dependences of the magnetization of the reference sample in a magnetic field of 1000 Oe.

Table S2. Averaging of the normalized atomic concentration in the sample according to the EDS data

| Element                  | Series   | Intensity<br>[a.u.] | Concentration<br>[wt %] | Concentration<br>[at %] | (3 Sigma)<br>[wt %] |
|--------------------------|----------|---------------------|-------------------------|-------------------------|---------------------|
| <b>Selected area (1)</b> |          |                     |                         |                         |                     |
| Iron                     | K-series | 39898               | 42.78                   | 20.86                   | 3.99                |
| Phosphorus               | K-series | 22919               | 18.7                    | 16.44                   | 1.8                 |
| Oxygen                   | K-series | 22307               | 33.66                   | 57.31                   | 3.18                |
| Sulfur                   | K-series | 317                 | 0.26                    | 0.22                    | 0.13                |
| Magnesium                | K-series | 5955                | 4.6                     | 5.15                    | 0.53                |
| Total:                   | --       | --                  | 100                     | 100                     |                     |
| <b>Selected area (2)</b> |          |                     |                         |                         |                     |
| Iron                     | K-series | 30165               | 55.47                   | 41.22                   | 5.17                |
| Phosphorus               | K-series | 261                 | 0.39                    | 0.52                    | 0.16                |
| Oxygen                   | K-series | 334                 | 0.86                    | 2.24                    | 0.24                |
| Sulfur                   | K-series | 32373               | 43.28                   | 56.01                   | 4.04                |
| Total:                   | --       | --                  | 100                     | 100                     |                     |

Table S3. Mössbauer parameters of the sample from 4 to 300 K.  $\delta$  is the chemical shift relative to  $\alpha$ -Fe,  $H_{hf}$  is the hyperfine field on iron nuclei,  $\Delta$  is the quadrupole splitting,  $W$  is the Mössbauer line FWHM,  $dW$  is the line broadening, and  $A$  is the relative site occupancy.

|       | $\delta$ , mm/s<br>$\pm 0.005$ | $H_{hf}$ ,<br>kOe, $\pm 3$ | $\Delta/2$ , mm/s<br>$\pm 0.01$ | $W$ , mm/s<br>$\pm 0.01$ | $dW$ , mm/s<br>$\pm 0.01$ | $A$ , a.u.<br>$\pm 0.03$ | Origin                                                              |
|-------|--------------------------------|----------------------------|---------------------------------|--------------------------|---------------------------|--------------------------|---------------------------------------------------------------------|
| 300 K |                                |                            |                                 |                          |                           |                          |                                                                     |
| S1    | 0.437                          | 304                        | -0.15                           | 0.74                     | 0.47                      | 0.05                     | Fe <sub>3</sub> S <sub>4</sub>                                      |
| D1    | 1.214                          | --                         | 2.51                            | 0.39                     | --                        | 0.10                     | Fe <sub>3</sub> (PO <sub>4</sub> ) <sub>2</sub> ·8H <sub>2</sub> O  |
| D2    | 1.266                          | --                         | 2.92                            | 0.22                     | --                        | 0.05                     |                                                                     |
| D3    | 1.242                          | --                         | 1.84                            | 0.29                     | --                        | 0.13                     | FeCO <sub>3</sub>                                                   |
| D4    | 0.365                          | --                         | 0.54                            | 0.42                     | --                        | 0.29                     | Fe <sub>2</sub> O <sub>3</sub> · <i>n</i> H <sub>2</sub> O          |
| D5    | 0.372                          | --                         | 0.67                            | 0.44                     | --                        | 0.14                     |                                                                     |
| D6    | 0.34                           | --                         | 1.03                            | 0.47                     | --                        | 0.24                     |                                                                     |
| 250 K |                                |                            |                                 |                          |                           |                          |                                                                     |
| S1    | 0.447                          | 306                        | -0.15                           | 0.74                     | 0.47                      | 0.05                     | Fe <sub>3</sub> S <sub>4</sub>                                      |
| S2    | 0.388                          | 311                        | -0.15                           | 0.10                     | 2.85                      | 0.25                     | Fe <sub>2</sub> O <sub>3</sub> · <i>n</i> H <sub>2</sub> O          |
| D1    | 1.351                          | --                         | 2.47                            | 0.40                     | --                        | 0.09                     | Fe <sub>3</sub> (PO <sub>4</sub> ) <sub>2</sub> ·8H <sub>2</sub> O  |
| D2    | 1.353                          | --                         | 2.96                            | 0.22                     | --                        | 0.04                     |                                                                     |
| D3    | 1.284                          | --                         | 1.94                            | 0.34                     | --                        | 0.11                     | FeCO <sub>3</sub>                                                   |
| D4    | 0.378                          | --                         | 0.50                            | 0.40                     | --                        | 0.16                     | Fe <sub>2</sub> O <sub>3</sub> · <i>n</i> H <sub>2</sub> O (SPM)    |
| D5    | 0.377                          | --                         | 0.82                            | 0.46                     | --                        | 0.18                     |                                                                     |
| D6    | 0.336                          | --                         | 1.15                            | 0.40                     | --                        | 0.12                     |                                                                     |
| 200 K |                                |                            |                                 |                          |                           |                          |                                                                     |
| S1    | 0.459                          | 314                        | -0.12                           | 0.30                     | 0.00                      | 0.05                     | Fe <sub>3</sub> S <sub>4</sub>                                      |
| S2    | 0.449                          | 410                        | -0.27                           | 1.07                     | 0.00                      | 0.11                     | Fe <sub>2</sub> O <sub>3</sub> · <i>n</i> H <sub>2</sub> O          |
| S3    | 0.567                          | 333                        | 0.00                            | 0.10                     | 3.64                      | 0.27                     |                                                                     |
| D1    | 1.364                          | --                         | 2.38                            | 0.42                     | --                        | 0.10                     | Fe <sub>3</sub> (PO <sub>4</sub> ) <sub>2</sub> ·8H <sub>2</sub> O  |
| D2    | 1.441                          | --                         | 2.86                            | 0.20                     | --                        | 0.03                     |                                                                     |
| D3    | 1.317                          | --                         | 1.91                            | 0.31                     | --                        | 0.09                     | FeCO <sub>3</sub>                                                   |
| D4    | 0.414                          | --                         | 0.51                            | 0.43                     | --                        | 0.15                     | Fe <sub>2</sub> O <sub>3</sub> · <i>n</i> H <sub>2</sub> O<br>(SPM) |
| D5    | 0.342                          | --                         | 0.98                            | 0.47                     | --                        | 0.08                     |                                                                     |
| D6    | 0.379                          | --                         | 1.16                            | 0.39                     | --                        | 0.12                     |                                                                     |
| 140 K |                                |                            |                                 |                          |                           |                          |                                                                     |
| S1    | 0.527                          | 322                        | 0.03                            | 0.52                     | 0.0                       | 0.04                     | Fe <sub>3</sub> S <sub>4</sub>                                      |
| S2    | 0.407                          | 434                        | -0.02                           | 0.65                     | 0.50                      | 0.16                     | Fe <sub>2</sub> O <sub>3</sub> · <i>n</i> H <sub>2</sub> O          |
| S3    | 0.348                          | 367                        | -0.38                           | 0.19                     | 2.79                      | 0.29                     |                                                                     |
| D1    | 1.417                          | --                         | 2.60                            | 0.41                     | --                        | 0.08                     | Fe <sub>3</sub> (PO <sub>4</sub> ) <sub>2</sub> ·8H <sub>2</sub> O  |
| D2    | 1.306                          | --                         | 3.28                            | 0.18                     | --                        | 0.04                     |                                                                     |
| D3    | 1.348                          | --                         | 2.07                            | 0.33                     | --                        | 0.10                     | FeCO <sub>3</sub>                                                   |
| D4    | 0.396                          | --                         | 0.64                            | 0.59                     | --                        | 0.18                     | Fe <sub>2</sub> O <sub>3</sub> · <i>n</i> H <sub>2</sub> O<br>(SPM) |
| D5    | 0.418                          | --                         | 0.91                            | 0.37                     | --                        | 0.10                     |                                                                     |

|       | $\delta$ , mm/s<br>$\pm 0.005$ | $H_{\text{hf}}$ ,<br>kOe, $\pm 3$ | $\Delta/2$ , mm/s<br>$\pm 0.01$ | $W$ , mm/s<br>$\pm 0.01$ | $dW$ , mm/s<br>$\pm 0.01$ | $A$ , a.u<br>$\pm 0.03$ | Origin                                                              |
|-------|--------------------------------|-----------------------------------|---------------------------------|--------------------------|---------------------------|-------------------------|---------------------------------------------------------------------|
| 110 K |                                |                                   |                                 |                          |                           |                         |                                                                     |
| S1    | 0.567                          | 321                               | 0.01                            | 0.37                     | 0.0                       | 0.04                    | Fe <sub>3</sub> S <sub>4</sub>                                      |
| S2    | 0.525                          | 445                               | -0.14                           | 0.67                     | 0.56                      | 0.27                    | Fe <sub>2</sub> O <sub>3</sub> · nH <sub>2</sub> O                  |
| S3    | 0.518                          | 325                               | -0.13                           | 0.10                     | 3.74                      | 0.22                    |                                                                     |
| D1    | 1.422                          | --                                | 2.35                            | 0.31                     | --                        | 0.07                    |                                                                     |
| D2    | 1.357                          | --                                | 3.10                            | 0.35                     | --                        | 0.05                    | Fe <sub>3</sub> (PO <sub>4</sub> ) <sub>2</sub> · 8H <sub>2</sub> O |
| D3    | 1.370                          | --                                | 2.04                            | 0.30                     | --                        | 0.09                    | FeCO <sub>3</sub>                                                   |
| D4    | 0.411                          | --                                | 0.72                            | 0.44                     | --                        | 0.11                    | Fe <sub>2</sub> O <sub>3</sub> · nH <sub>2</sub> O                  |
| D5    | 0.466                          | --                                | 0.88                            | 0.61                     | --                        | 0.15                    | (SPM)                                                               |
| 80 K  |                                |                                   |                                 |                          |                           |                         |                                                                     |
| S1    | 0.562                          | 323                               | 0.11                            | 0.43                     | 0.07                      | 0.05                    | Fe <sub>3</sub> S <sub>4</sub>                                      |
| S2    | 0.503                          | 465                               | -0.08                           | 0.53                     | 0.43                      | 0.22                    | Fe <sub>2</sub> O <sub>3</sub> · nH <sub>2</sub> O                  |
| S3    | 0.474                          | 392                               | -0.13                           | 0.48                     | 1.97                      | 0.30                    |                                                                     |
| D1    | 1.472                          | --                                | 2.55                            | 0.40                     | --                        | 0.08                    |                                                                     |
| D2    | 1.372                          | --                                | 3.24                            | 0.24                     | --                        | 0.04                    | Fe <sub>3</sub> (PO <sub>4</sub> ) <sub>2</sub> · 8H <sub>2</sub> O |
| D3    | 1.399                          | --                                | 2.10                            | 0.37                     | --                        | 0.09                    | FeCO <sub>3</sub>                                                   |
| D4    | 0.412                          | --                                | 0.64                            | 0.46                     | --                        | 0.11                    | Fe <sub>2</sub> O <sub>3</sub> · nH <sub>2</sub> O                  |
| D5    | 0.459                          | --                                | 1.06                            | 0.50                     | --                        | 0.12                    | (SPM)                                                               |
| 50 K  |                                |                                   |                                 |                          |                           |                         |                                                                     |
| S1    | 0.612                          | 326                               | 0.05                            | 0.44                     | 0.10                      | 0.04                    | Fe <sub>3</sub> S <sub>4</sub>                                      |
| S2    | 0.519                          | 483                               | -0.10                           | 0.49                     | 0.24                      | 0.19                    | Fe <sub>2</sub> O <sub>3</sub> · nH <sub>2</sub> O                  |
| S3    | 0.481                          | 347                               | -0.34                           | 0.10                     | 3.89                      | 0.21                    |                                                                     |
| S4    | 0.490                          | 443                               | 0.00                            | 0.45                     | 0.74                      | 0.18                    |                                                                     |
| D1    | 1.511                          | --                                | 2.64                            | 0.69                     | --                        | 0.09                    | Fe <sub>3</sub> (PO <sub>4</sub> ) <sub>2</sub> · 8H <sub>2</sub> O |
| D2    | 1.371                          | --                                | 3.27                            | 0.17                     | --                        | 0.04                    |                                                                     |
| D3    | 1.429                          | --                                | 2.21                            | 0.52                     | --                        | 0.08                    |                                                                     |
| D4    | 0.393                          | --                                | 0.66                            | 0.58                     | --                        | 0.09                    | Fe <sub>2</sub> O <sub>3</sub> · nH <sub>2</sub> O                  |
| D5    | 0.449                          | --                                | 0.99                            | 0.55                     | --                        | 0.10                    | (SPM)                                                               |
| 4.2 K |                                |                                   |                                 |                          |                           |                         |                                                                     |
| S1    | 0.624                          | 327                               | 0.00                            | 0.42                     | 0.16                      | 0.05                    | Fe <sub>3</sub> S <sub>4</sub>                                      |
| S2    | 0.510                          | 490                               | -0.17                           | 0.38                     | 0.39                      | 0.28                    | Fe <sub>2</sub> O <sub>3</sub> · nH <sub>2</sub> O                  |
| S3    | 0.512                          | 512                               | -0.08                           | 0.42                     | 0.11                      | 0.18                    |                                                                     |
| S4    | 0.501                          | 461                               | 0.03                            | 0.51                     | 0.96                      | 0.24                    |                                                                     |
| S5    | 1.231                          | 223                               | -2.44                           | 1.33                     | 0.40                      | 0.08                    | Fe <sub>3</sub> (PO <sub>4</sub> ) <sub>2</sub> · 8H <sub>2</sub> O |
| S6    | 1.423                          | 136                               | 2.58                            | 0.26                     | 0.46                      | 0.07                    |                                                                     |
| S7    | 1.359                          | 169                               | 2.05                            | 0.20                     | 1.00                      | 0.12                    |                                                                     |
